# Supplementary material
Source: publisher figshare collection journal article supplement (https://gsajournals.figshare.com/ndownloader/files/32118740)
Supplement: Supplementary file 1 [file 32118740]

## Sheet: Sheet1
Blood cis-mQTLs for CD-associated CpGs at FDR level are tested in ileal biopsies (n=40) separately for cases (n=) and controls (n=23)
SNP	CpG	Cases_Estimates	Cases_pvalue	Controls_Estimates	Controls_pvalue	Interaction_pvalue
rs12694890	cg09004241	0.0912588	0.0257212	-0.0160395	0.0721739	0.000662388
rs12999051	cg09004241	0.0912588	0.0257212	-0.0160395	0.0721739	0.000662388
rs12998237	cg09004241	0.0912588	0.0257212	-0.0160395	0.0721739	0.000662388
rs12993290	cg09004241	0.0912588	0.0257212	-0.0160395	0.0721739	0.000662388
rs4789571	cg13074526	-0.0552453	0.0870298	0.0402431	0.0645443	0.00123233
rs4239004	cg13074526	-0.0552453	0.0870298	0.0402431	0.0645443	0.00123233
rs12453848	cg13074526	-0.0488931	0.085544	0.0401444	0.0730872	0.00128404
rs61611055	cg13074526	-0.0488931	0.085544	0.0401444	0.0730872	0.00128404
rs11871892	cg13074526	-0.0488931	0.085544	0.0173387	0.349622	0.00414811
rs13198609	cg08895133	0.0176673	0.510739	-0.0176521	0.00537963	0.0043659
rs10849488	cg17281677	0.0201662	0.0680106	-0.000486601	0.932582	0.0044648
rs7294323	cg17281677	0.0201662	0.0680106	-0.000486601	0.932582	0.0044648
rs11064249	cg17281677	0.0201513	0.0979352	-0.000195975	0.972251	0.00532032
rs10774437	cg17281677	0.0201513	0.0979352	-0.000195975	0.972251	0.00532032
rs7132183	cg17281677	0.0201513	0.0979352	-0.000195975	0.972251	0.00532032
rs7132298	cg17281677	0.0201513	0.0979352	-0.000195975	0.972251	0.00532032
rs9376442	cg01153613	0.0586141	0.00837898	-0.00948856	0.573671	0.00625106
rs12527652	cg01153613	0.0586141	0.00837898	-0.00948856	0.573671	0.00625106
rs17808072	cg01153613	0.0586141	0.00837898	-0.00948856	0.573671	0.00625106
rs6933425	cg01153613	0.0586141	0.00837898	-0.00948856	0.573671	0.00625106
rs108728	cg15402265	0.0222157	0.190633	-0.00546857	0.444119	0.00738003
rs12701931	cg24830274	-0.0521785	0.502829	0.0225582	0.314744	0.00740798
rs11764592	cg24830274	-0.0521785	0.502829	0.0225582	0.314744	0.00740798
rs4534057	cg24830274	-0.0521785	0.502829	0.0225582	0.314744	0.00740798
rs573712	cg19208876	0.0722621	0.0270514	-0.0332171	0.0915518	0.00765815
rs151346	cg15402265	0.0198431	0.288322	-0.00546857	0.444119	0.00777825
rs7803390	cg24830274	-0.0521785	0.502829	0.0362461	0.133945	0.00788363
rs3886608	cg24830274	-0.0521785	0.502829	0.0362461	0.133945	0.00788363
rs11672002	cg05840754	-0.0359215	0.165386	0.0374743	0.193922	0.00845893
rs6959969	cg24830274	0.0591197	0.617728	-0.0126216	0.630651	0.00921312
rs12532020	cg24830274	0.0591197	0.617728	-0.0126216	0.630651	0.00921312
rs4724067	cg24830274	-0.0359755	0.644381	0.0225582	0.314744	0.00936829
rs2108176	cg24830274	-0.0359755	0.644381	0.0225582	0.314744	0.00936829
rs10951654	cg24830274	-0.0359755	0.644381	0.0225582	0.314744	0.00936829
rs10951660	cg24830274	0.0815473	0.162478	-0.0126216	0.630651	0.00960626
rs4720406	cg24830274	0.0815473	0.162478	-0.0126216	0.630651	0.00960626
rs2214874	cg24830274	0.0815473	0.162478	-0.0126216	0.630651	0.00960626
rs6463042	cg24830274	0.0815473	0.162478	-0.0126216	0.630651	0.00960626
rs4724071	cg24830274	0.0815473	0.162478	-0.0126216	0.630651	0.00960626
rs108727	cg15402265	0.0222157	0.190633	-0.00564199	0.426693	0.0100562
rs151344	cg15402265	0.0222157	0.190633	-0.00564199	0.426693	0.0100562
rs6571337	cg01751040	0.0122356	0.579497	-0.0013007	0.709524	0.0108042
rs12603268	cg13074526	0.0630545	0.0419355	-0.00930291	0.551043	0.0124863
rs720816	cg24830274	-0.0521785	0.502829	0.0362461	0.133945	0.0128343
rs4867424	cg06726471	0.0393831	0.220262	-0.033374	0.05091	0.0150566
rs10417391	cg02370334	0.00436518	0.849745	-0.035848	0.00690097	0.0182348
rs151353	cg15402265	0.0176791	0.328311	-0.00564199	0.426693	0.0184948
rs16900918	cg08895133	-0.00184902	0.909076	-0.0176521	0.00537963	0.0230586
rs1956464	cg01751040	0.010271	0.638117	-0.00142052	0.705726	0.0231797
rs10892923	cg02763813	0.102226	0.0810415	-0.00670344	0.601266	0.024425
rs9820225;rs71620530;rs35553929	cg13238348	0.0392399	0.089452	5.3616e-05	0.995742	0.025357
rs9322848	cg01751040	0.0135472	0.410319	-0.00142052	0.705726	0.0256123
rs1033706	cg01751040	0.0135472	0.410319	-0.00142052	0.705726	0.0256123
rs1159551	cg01751040	0.0135472	0.410319	-0.00142052	0.705726	0.0256123
rs1956463	cg01751040	0.0135472	0.410319	-0.00142052	0.705726	0.0256123
rs1956462	cg01751040	0.0135472	0.410319	-0.00142052	0.705726	0.0256123
rs17096356	cg01751040	0.0135472	0.410319	-0.00142052	0.705726	0.0256123
rs10122824	cg13781414	-0.0225978	0.311696	0.0230832	0.0488289	0.026976
rs11218882	cg02763813	0.102618	0.0569018	-0.00670344	0.601266	0.0270889
rs10892922	cg02763813	0.102618	0.0569018	-0.00670344	0.601266	0.0270889
rs28380685	cg26562462	0.0449705	0.397067	-0.0126883	0.3366	0.0290696
rs10937771	cg26562462	0.0239804	0.407971	-0.00567499	0.647011	0.0322401
rs10873201	cg06724236	-0.0204988	0.439516	0.00270766	0.630891	0.0333694
rs61151985	cg02893324	0.00161764	0.867117	-0.0139206	0.106582	0.033539
rs9368637	cg16586538	0.0199393	0.508095	-0.0191703	0.0187122	0.03423
rs73726882	cg16586538	0.0199393	0.508095	-0.0191703	0.0187122	0.03423
rs2022082	cg16586538	0.0199393	0.508095	-0.0191703	0.0187122	0.03423
rs12878807	cg06724236	-0.0204988	0.439516	-0.0002745	0.960994	0.0346201
rs11158671	cg06724236	-0.0204988	0.439516	-0.0002745	0.960994	0.0346201
rs72719193	cg06724236	-0.0204988	0.439516	-0.0002745	0.960994	0.0346201
rs1885041	cg06724236	-0.0204988	0.439516	-0.0002745	0.960994	0.0346201
rs543057;rs112400634	cg12368752	-0.0485431	0.208935	0.00154831	0.886228	0.0348639
rs4733085	cg00739259	-0.015732	0.398921	0.0311093	0.0663329	0.0359856
rs4733087	cg00739259	-0.015732	0.398921	0.0311093	0.0663329	0.0359856
rs10763666	cg06097048	0.0450586	0.455268	-0.00699196	0.697075	0.0364144
rs10826475;rs71525510	cg06097048	0.0450586	0.455268	-0.00699196	0.697075	0.0364144
rs6136874	cg25291653	0.128237	0.0318917	0.0341193	0.0896202	0.0368837
rs6046415	cg25291653	0.128237	0.0318917	0.0341193	0.0896202	0.0368837
rs1980615	cg06724236	-0.0211246	0.154334	0.00217358	0.697222	0.0370658
rs12975438	cg05840754	-0.0242961	0.280494	0.0480352	0.174695	0.0376216
rs4733089	cg00739259	-0.015732	0.398921	0.0363562	0.0305507	0.0378199
rs9460189	cg17108423	0.0637705	0.29147	-0.0147271	0.202028	0.038134
rs4272143	cg06726471	0.0393831	0.220262	-0.0213221	0.255429	0.0381514
rs2333665	cg01751040	0.0082213	0.333839	-0.00127803	0.715858	0.0388107
rs2877991	cg01751040	0.0082213	0.333839	-0.00127803	0.715858	0.0388107
rs56413023	cg06726471	-0.0747169	0.162116	0.0521763	0.00096883	0.0391679
rs2877263	cg06726471	-0.0747169	0.162116	0.0521763	0.00096883	0.0391679
rs6132240	cg25291653	0.128237	0.0318917	0.0341343	0.0911376	0.0395234
rs6136873	cg25291653	0.128237	0.0318917	0.0341343	0.0911376	0.0395234
rs315113	cg18707141	-0.00914933	0.696095	0.0117869	0.0685971	0.040038
rs2603089	cg18707141	-0.00914933	0.696095	0.0117869	0.0685971	0.040038
rs2603090	cg18707141	-0.00914933	0.696095	0.0117869	0.0685971	0.040038
rs315111	cg18707141	-0.00914933	0.696095	0.0117869	0.0685971	0.040038
rs685934	cg18707141	-0.00914933	0.696095	0.0117869	0.0685971	0.040038
rs642786	cg18707141	-0.00914933	0.696095	0.0117869	0.0685971	0.040038
rs315131	cg18707141	-0.00914933	0.696095	0.0117869	0.0685971	0.040038
rs315134	cg18707141	-0.00914933	0.696095	0.0117869	0.0685971	0.040038
rs315138	cg18707141	-0.00914933	0.696095	0.0117869	0.0685971	0.040038
rs528974	cg18707141	-0.00914933	0.696095	0.0117869	0.0685971	0.040038
rs630725	cg18707141	-0.00914933	0.696095	0.0117869	0.0685971	0.040038
rs315124	cg18707141	-0.00914933	0.696095	0.0117869	0.0685971	0.040038
rs10946273	cg17108423	0.0179661	0.476619	-0.0138211	0.230366	0.0421482
rs2967572	cg08474813	0.0475301	0.0249371	-0.00846851	0.648628	0.0428665
rs2910441	cg08474813	0.0475301	0.0249371	-0.00846851	0.648628	0.0428665
rs889178	cg08474813	0.0475301	0.0249371	-0.00846851	0.648628	0.0428665
rs889181	cg08474813	0.0475301	0.0249371	-0.00846851	0.648628	0.0428665
rs2617834	cg18707141	-0.00914933	0.696095	0.0116024	0.0704192	0.0441227
rs2617835	cg18707141	-0.00914933	0.696095	0.0116024	0.0704192	0.0441227
rs588493	cg18707141	-0.00914933	0.696095	0.0116024	0.0704192	0.0441227
rs589448	cg18707141	-0.00914933	0.696095	0.0116024	0.0704192	0.0441227
rs777272	cg18707141	-0.00914933	0.696095	0.0116024	0.0704192	0.0441227
rs590681	cg18707141	-0.00914933	0.696095	0.0116024	0.0704192	0.0441227
rs523398	cg18707141	-0.00914933	0.696095	0.0116024	0.0704192	0.0441227
rs1669089	cg09494379	-0.00442397	0.761545	-0.0105703	0.230371	0.0446197
rs6740838	cg12126990	0.0252087	0.352657	-0.0125803	0.251131	0.0449028
rs10022657	cg26562462	0.0383212	0.445991	-0.00567499	0.647011	0.0450988
rs10007295	cg26562462	0.0383212	0.445991	-0.00567499	0.647011	0.0450988
rs12208359	cg23216724	0.0462004	0.260712	-0.0107708	0.282899	0.0451175
rs10946207	cg23216724	0.0462004	0.260712	-0.0107708	0.282899	0.0451175
rs2038580	cg23216724	0.0462004	0.260712	-0.0107708	0.282899	0.0451175
rs6446553	cg26562462	-0.0357679	0.235441	-0.00214156	0.856506	0.0451799
rs6750502	cg09494379	-0.0167771	0.0299157	-0.00821254	0.341416	0.0452554
rs62015732	cg17927313	-0.0343972	0.123036	0.00710522	0.590134	0.0452935
rs10019256	cg26562462	0.0479989	0.57355	-0.00567499	0.647011	0.0454867
rs150544791	cg01751040	0.00995793	0.353496	-0.0013007	0.709524	0.0459639
rs141670207	cg01751040	0.00995793	0.353496	-0.0013007	0.709524	0.0459639
rs1956470	cg01751040	0.00995793	0.353496	-0.0013007	0.709524	0.0459639
rs10132540	cg01751040	0.00995793	0.353496	-0.0013007	0.709524	0.0459639
rs8012537	cg01751040	0.00995793	0.353496	-0.0013007	0.709524	0.0459639
rs1968025	cg01751040	0.00995793	0.353496	-0.0013007	0.709524	0.0459639
rs10150544	cg01751040	0.00995793	0.353496	-0.0013007	0.709524	0.0459639
rs8005393	cg01751040	0.00995793	0.353496	-0.0013007	0.709524	0.0459639
rs12541235	cg00739259	-0.015732	0.398921	0.0374367	0.0322795	0.0461886
rs4733255	cg00739259	-0.015732	0.398921	0.0374367	0.0322795	0.0461886
rs13275209	cg00739259	-0.015732	0.398921	0.0374367	0.0322795	0.0461886
rs4362612	cg00739259	-0.015732	0.398921	0.0374367	0.0322795	0.0461886
rs4428059	cg00739259	-0.015732	0.398921	0.0374367	0.0322795	0.0461886
rs2341175	cg00739259	-0.015732	0.398921	0.0374367	0.0322795	0.0461886
rs62500965	cg00739259	-0.015732	0.398921	0.0374367	0.0322795	0.0461886
rs12681671	cg00739259	-0.015732	0.398921	0.0374367	0.0322795	0.0461886
rs10954792	cg00739259	-0.015732	0.398921	0.0374367	0.0322795	0.0461886
rs13248033	cg00739259	-0.015732	0.398921	0.0374367	0.0322795	0.0461886
rs12648134	cg26562462	0.0404928	0.324904	-0.00567499	0.647011	0.0464132
rs6750385	cg09494379	-0.0167771	0.0299157	-0.00821254	0.341416	0.0470187
rs12209395	cg23216724	0.0530183	0.163869	-0.0107708	0.282899	0.0471384
rs6920858	cg23216724	0.0530183	0.163869	-0.0107708	0.282899	0.0471384
rs9459854	cg23216724	0.0530183	0.163869	-0.0107708	0.282899	0.0471384
rs10484530	cg23216724	0.0530183	0.163869	-0.0107708	0.282899	0.0471384
rs2157388	cg23216724	0.0530183	0.163869	-0.0107708	0.282899	0.0471384
rs9457260	cg23216724	0.0530183	0.163869	-0.0107708	0.282899	0.0471384
rs17524252	cg23216724	0.0530183	0.163869	-0.0107708	0.282899	0.0471384
rs4710175	cg23216724	0.0530183	0.163869	-0.0107708	0.282899	0.0471384
rs916331	cg23216724	0.0530183	0.163869	-0.0107708	0.282899	0.0471384
rs13204839	cg23216724	0.0530183	0.163869	-0.0107708	0.282899	0.0471384
rs6456152	cg23216724	0.0530183	0.163869	-0.0107708	0.282899	0.0471384
rs9457262	cg23216724	0.0530183	0.163869	-0.0107708	0.282899	0.0471384
rs4412174	cg23216724	0.0530183	0.163869	-0.0107708	0.282899	0.0471384
rs4458654	cg23216724	0.0530183	0.163869	-0.0107708	0.282899	0.0471384
rs34155048	cg23216724	0.0530183	0.163869	-0.0107708	0.282899	0.0471384
rs34611616	cg23216724	0.0530183	0.163869	-0.0107708	0.282899	0.0471384
rs7766242	cg23216724	0.0530183	0.163869	-0.0107708	0.282899	0.0471384
rs2239827	cg23216724	0.0530183	0.163869	-0.0107708	0.282899	0.0471384
rs9459855	cg23216724	0.0530183	0.163869	-0.0107708	0.282899	0.0471384
rs554591	cg18707141	-0.00914933	0.696095	0.0118724	0.0815928	0.0484831
rs2249093	cg18707141	-0.00914933	0.696095	0.0118724	0.0815928	0.0484831
rs623853	cg18707141	-0.00914933	0.696095	0.0118724	0.0815928	0.0484831
rs634512	cg18707141	-0.00914933	0.696095	0.0118724	0.0815928	0.0484831
rs1060404	cg23216724	0.0462004	0.260712	-0.00940932	0.349053	0.0491604
rs4710171	cg23216724	0.0462004	0.260712	-0.00940932	0.349053	0.0491604
rs9457252	cg23216724	0.0462004	0.260712	-0.00940932	0.349053	0.0491604
rs3752520	cg23216724	0.0462004	0.260712	-0.00940932	0.349053	0.0491604
rs9459849	cg23216724	0.0462004	0.260712	-0.00940932	0.349053	0.0491604
rs9457259	cg23216724	0.0462004	0.260712	-0.00940932	0.349053	0.0491604
rs10946204	cg23216724	0.0462004	0.260712	-0.00940932	0.349053	0.0491604
rs9457256	cg23216724	0.0462004	0.260712	-0.00940932	0.349053	0.0491604
rs10484531	cg23216724	0.0462004	0.260712	-0.00940932	0.349053	0.0491604
rs4767170	cg12438536	-0.038294	0.0273558	0.00960501	0.389655	0.04961
